# Direct brain recordings reveal continuous encoding of structure in random stimuli

Julian Fuhrer<sup>a</sup>, Kyrre Glette<sup>a</sup>, Jugoslav Ivanovic<sup>b</sup>, Pål Gunnar Larsson<sup>b</sup>, Tristan Bekinschtein<sup>c</sup>, Silvia Kochen<sup>d</sup>, Robert T. Knight<sup>e</sup>, Jim Tørresen<sup>a</sup>, Anne-Kristin Solbakk<sup>b,f,g</sup>, Tor Endestad<sup>f,g</sup>, and Alejandro Blenkmann<sup>\*:g</sup>

<sup>a</sup>RITMO, Department of Informatics, University of Oslo, 0373 Oslo, Norway

<sup>b</sup>Department of Neurosurgery, Oslo University Hospital, Rikshospitalet, 0372 Oslo, Norway

<sup>c</sup>Cambridge Consciousness and Cognition Lab, Department of Psychology, University of Cambridge, Cambridge CB2 3EB, United Kingdom

<sup>d</sup>Studies in Neurosciences and Complex Systems, National Scientific and Technical Research Council, El Cruce Hospital, Arturo Jauretche National University, 1882 Buenos Aires, Argentina

<sup>e</sup>Helen Wills Neuroscience Institute and Department of Psychology, University of California, Berkeley, CA 94720, USA

<sup>f</sup>Department of Neuropsychology, Helgeland Hospital, 8657 Mosjøen, Norway

<sup>g</sup>RITMO, Department of Psychology, University of Oslo, 0373 Oslo, Norway

## Abstract

The brain excels at processing sensory input, even in rich or chaotic environments. Mounting evidence attributes this to the creation of sophisticated internal models of the environment that draw on statistical structures in the unfolding sensory input. Understanding how and where this modeling takes place is a core question in statistical learning and predictive processing. In this context, we address the role of transitional probabilities as an implicit structure supporting the encoding of a random auditory stream. Leveraging information-theoretical principles and the high spatiotemporal resolution of intracranial electroencephalography, we analyzed the trial-by-trial high-frequency activity representation of transitional probabilities. This unique approach enabled us to demonstrate how the brain continuously encodes structure in random stimuli and revealed the involvement of a network outside of the auditory system, including hippocampal, frontal, and temporal regions. Linking the frameworks of statistical learning and predictive processing, our work illuminates an implicit process that can be crucial for the swift detection of patterns and unexpected events in the environment.

*Statistical learning | pattern detection | predictive coding | high-frequency activity | MMN*

Efficient encoding of patterns in ongoing sensory input is critical for survival in an ever-changing environment. Pattern encoding involves the continuous updating of internal representations of the environment based on statistical structures derived from the sensory signal (1–7). The brain is not inherently aware of the underlying structures in the environment and potential regularities in the sensory stream must be assessed with regard to previously encoded regularity (8–10). Sensitivity to conditional regularity between events has been observed in humans (11–21) and animals (22, 23). Because events in the environment rarely occur independently, this pattern extraction is necessary for the fast and efficient processing of sensory information.

A mathematical representation of such conditional regularity is transitional probabilities (TPs). TPs describe how likely one event predicts another. That is the ratio of the directional co-occurrence of events given their frequency (3, 24–26). As an example, experimental studies in infants and adults have shown that the TPs between syllables constitute patterns that facilitate the identification of word-like units (11, 26–30), thus making TP encoding essential for language development (3, 4, 25, 28, 31–33).

While the brain’s sensitivity to conditional regularities has been observed in experimental studies across sensory domains, the underlying mechanisms remain poorly understood (3, 27, 28, 34–41). Studies on sensory processing and statistical learning have reported engagement of multiple brain structures, suggesting that the perception or learning of statistical regularities is not performed by one neural region, but rather may be supported by multiple regions working in parallel (28, 32, 33, 39, 42, 43, for other hypotheses, see review 28). Sensory modality-general areas, such as the prefrontal cortex and the hippocampus,

\*E-mail address: a.o.blenkmann@psykologi.uio.no

46 as well as lower perceptual or modality-specific regions, are proposed to subserve this capacity. How-  
47 ever, detailed knowledge about the brain regions contributing to this dynamic and adaptive process is  
48 limited (3, 14, 29, 33, 39, 40, 44, 45).

49 To address this gap, we hypothesized that a core function of the brain is to encode TPs in a continuous  
50 and online fashion and that this is implemented in a distributed manner. Specifically, we investigated  
51 how different brain regions contribute to statistical learning by exploiting the high temporal and spa-  
52 tial resolution of intracranial electroencephalography (iEEG). We estimated the trial-by-trial information  
53 content of high-frequency activity (HFA; 75 to 145 Hz), a correlate of population neuronal spiking, from  
54 participants that were passively exposed to a sequence of randomly occurring tones. We then evalu-  
55 ated this information content estimate against the dynamic TPs of the sequence, stemming from an ideal  
56 observer model. Our results reveal that the brain continuously encodes the TPs in a stream of random  
57 stimuli through a network that spans areas outside the auditory system, including hippocampal, frontal,  
58 and temporal regions. Remarkably, this automatic process occurs even in the absence of evident relations  
59 within the stimuli or behavioral relevance.

## 60 Results

### 61 iEEG Unattended Listening Task

62 Participants ( $n=22$ ; *Materials and Methods*) listened to a stream of tones where a standard tone alternated  
63 with deviant tones ( $P=0.5$ ; inter-stimulus interval 500 ms). This stream followed a multi-dimensional  
64 auditory oddball paradigm, where deviant tones varied relative to the standard in terms of either frequency,  
65 intensity, perceived sound-source location, a shortened duration, or a gap in the middle of the tone ( $P=0.1$   
66 for each deviant type; Fig. 1, *Materials and Methods*). Within a set of ten tones (five standard tones and  
67 five deviant tones), each of the five deviant types was presented once in random order. For deviations  
68 in location, intensity, and frequency, two stimuli versions were used ( $P=0.5$ ), namely, location left/right,  
69 intensity low/high, and frequency low/high. Together with the other two deviants, this resulted in eight  
70 potential deviants. During recording, participants were asked not to pay attention to the sounds while  
71 reading a book or magazine. All participants reported that they were able to focus on the reading material  
72 and did not attend to the tones or noticed any patterns in the stimuli.

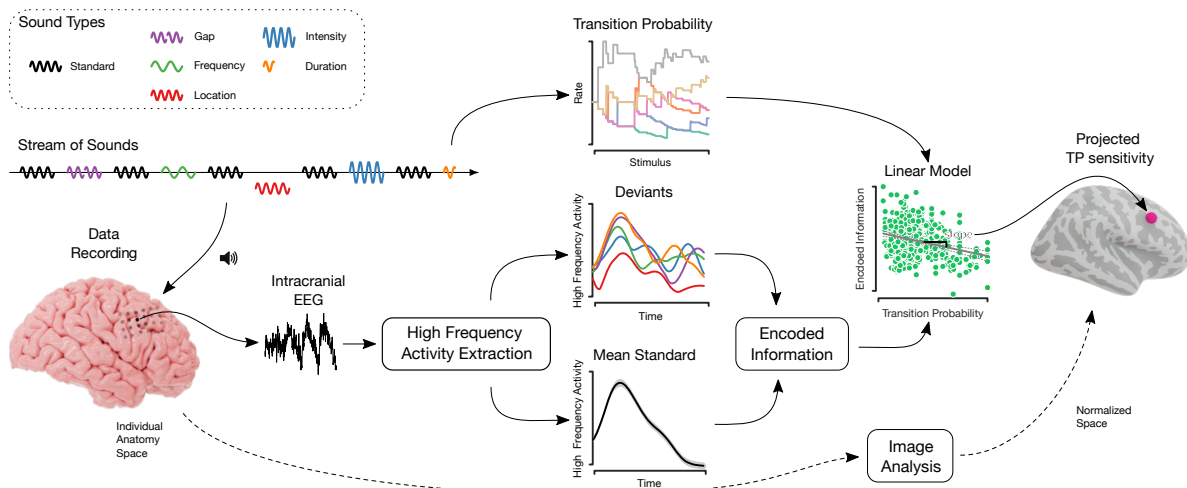

**Figure 1:** Overview of the analysis. An unattended listening task was presented to participants while recording their event-related electrical brain activity through intracranial electrodes. The emerging iEEG signal was then analyzed, resulting in HFA responses to standard and deviant tones. Based on the standards we computed a channel-specific mean standard response. Differences in normalized encoded information between deviant and mean standard responses were computed using a compression algorithm. The higher the value of this encoded information measure, the lower the similarity between the mean standard and a respective deviant tone response. In the next step, linear models between encoded information and TP estimates were employed, where the latter stemmed from an ideal observer analyzing the stream of sounds. After accounting for multiple comparisons, these channel-specific slopes were then projected onto the normalized anatomical space to enable comparison across subjects.

73 From the 22 participants, a total of 1078 channels (mean: 48, range: 12 to 104) were recorded. The

74 recordings were manually cleaned by excluding noisy or epileptic channels or segments from the analysis.  
75 HFA was then reliably extracted from a total of 785 channels within cortical or subcortical structures, and  
76 HFA event responses (trials) were evaluated in the 400 ms time window following the sound onset.

## 77 **Encoded Information Peaks in Primary and Secondary Auditory Cortices**

78 We estimated the information content of each deviant tone HFA response in relation to the HFA re-  
79 sponses to standard tones. Accordingly, the information content in standard responses was used as a  
80 reference point to measure the information content in deviant responses, which yielded a normalized  
81 measure of *encoded information* for each deviant response (Fig. 1, bottom; *Materials and Methods*).  
82 Smaller values of *encoded information* suggest that the information content in deviants is similar to the  
83 one in standards, whereas greater values indicate a larger amount of encoded information in the responses  
84 to deviants compared to standards. To systematically evaluate the involvement level across the cortex,  
85 we defined regions of interest (ROIs) that typically engage in auditory processing and statistical learn-  
86 ing tasks (1, 28, 32, 33, 41), comprising temporal, frontal, insular, peri-central sulci, and ACC cortices,  
87 as well as the hippocampus (Fig. 2a, Tab. S1). We then compared the *encoded information* across the  
88 ROIs. The greatest median *encoded information* values were observed in primary and secondary audi-  
89 tory cortices (superior temporal plane, insula posterior, and temporal lateral ROIs), suggesting that core  
90 aspects of deviant processing locate there (Fig. 2b, two-tailed pairwise Mann–Whitney–Wilcoxon tests,  
91 FDR corrected,  $p \leq 1.12e-2$ ,  $|z| \geq 2.5$ ). Each ROI’s median encoded information were significantly  
92 greater than zero (one-tailed Wilcoxon signed-rank test, FDR corrected,  $p \leq 1.22e-4$ ,  $z \geq 4.53$ ). Added  
93 together, these results indicate that the encoded information in the responses to deviants reflects the local  
94 sensitivity of specific brain areas to unexpected events in accordance with previous studies on deviance  
95 detection (46–49). Additionally, we examined the sensitivity to specific deviant types across ROIs. Sta-  
96 tistical analysis only identified significant differences in the encoded information of specific deviant types  
97 in the superior frontal area. The statistically significant differences were between the deviant types of  
98 ”location left”, ”intensity up”, and ”frequency down” to ”gap”, respectively (Fig. S6, two-tailed pairwise  
99 Mann–Whitney–Wilcoxon tests, FDR corrected,  $p \leq 5.30e-4$ ,  $z \geq 3.5$ ).

## 100 **Encoded Information is Hierarchically Organized**

101 Previous animal and human studies indicate a hierarchical organization of brain regions behind the detec-  
102 tion of unexpected events (6, 41, 42, 50). We utilized a proxy measure of anatomical hierarchy to inves-  
103 tigate to what extent this is reflected in the *encoded information* values across brain regions. Anatomical  
104 hierarchy can be defined as a global ordering of cortical areas corresponding to characteristic laminar  
105 patterns of inter-areal feedforward and feedback projections (5, 51, 52). Proxied cortical hierarchy levels  
106 that quantify these projections across the cortex were obtained from open-access structural magnetic res-  
107 onance imaging (MRI) datasets from the S1200 subject release (53; *Materials and Methods*). Method-  
108 ological constraints in (53) precluded the mapping of the hippocampus in the present analysis. Areas  
109 lower in the hierarchy (with predominantly feedforward projections) are primarily associated with pri-  
110 mary sensory functions, whereas areas higher in the hierarchy are associated with higher cognitive func-  
111 tions (5, 51, 52). For each contact point, hierarchy level channel estimates were determined by taking the  
112 average value of all proximal points located within the contact point vicinity. We observed a significant  
113 negative correlation between the *encoded information* and the proxied cortical hierarchy levels (Fig. 2c;  
114 linear mixed-effects model with random effects for subjects:  $y = \beta_0 + \beta_1 x + b_0 + \epsilon$ , with proxied hierar-  
115 chy level  $y$ , the encoded information  $x$ , the random effect for subjects  $b_0 \sim N(0, \sigma_b^2)$  and the observation  
116 error  $\epsilon \sim N(0, \sigma^2)$ ;  $\beta_0 = 0.16$ , 95% CI [0.13, 0.19],  $\beta_1 = -0.33$ , 95% CI [-0.21 -0.44],  $p_{\beta_1} = 1.22e-7$ ,  
117  $\sigma_b = 3.94e-2$ , 95% CI [2.79e-2, 5.64e-2],  $\sigma = 7.54e-2$ , 95% CI [7.16e-2, 7.92e-2]).

## 118 **Ensemble Activity Exhibits Sensitivity to Transitional Probabilities**

119 During the time course of the stimuli, we incrementally estimated TPs in the fashion of an ideal observer.  
120 At each given deviant event (trial), TP estimates were updated based on all previously presented deviant

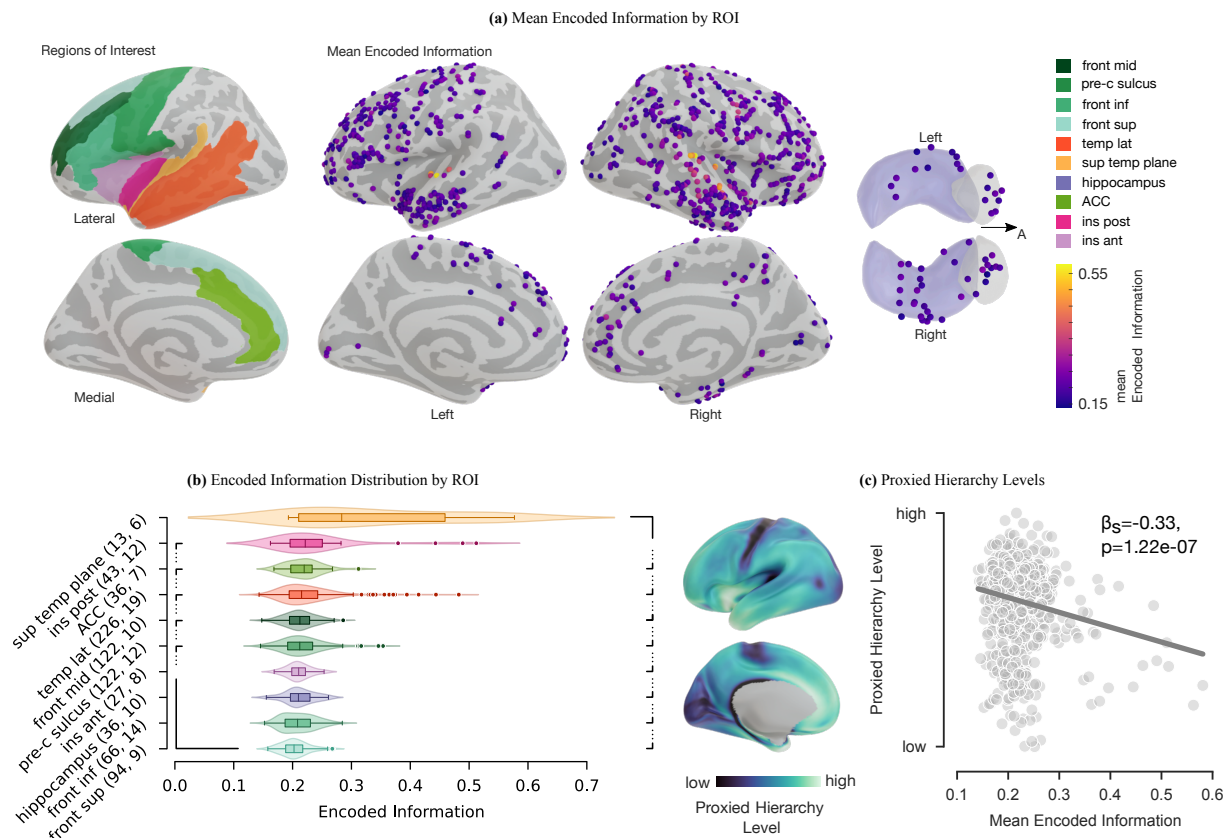

**Figure 2:** Illustration of the encoded information analysis results. **a:** Top: ROIs on the inflated brain model (Tab. S1 for full region labels). Bottom: lateral and medial view of the mean encoded information distribution across 22 subjects projected onto the inflated brain model. The image on the bottom right shows the transverse plane of the amygdala (gray) and hippocampus (purple). "A" stands for the anterior direction. Each sphere represents one channel. **b:** Distribution of the ROIs' encoded information. The number of channels (first) and subjects (second) for each ROI are in the axis labels. The nested brackets indicate a significant difference between median values.

121 stimuli. Consequently, TPs dynamically evolved along the course of the experiment since a finite stream,  
 122 as opposed to an infinite horizon stream, naturally entails temporal patterns because of the alternating oc-  
 123 currence of deviants (Fig. 1, TP graph, *Materials and Methods*). To determine which brain area exhibits  
 124 a sensitivity to these temporal relations we evaluated the relationship between HFA encoded information  
 125 and the TPs of deviant tones through robust linear models. Before regression, the trial-specific encoded  
 126 information values were normalized by the channel means to correct the encoded information that solely  
 127 reflects auditory sound processing mechanisms (Fig. S7). For each channel, the resulting slope is defined  
 128 as the channel-specific *TP sensitivity*. *TP sensitivity* values acted as an indicator of how sensitive the  
 129 brain tissue around the channel was towards TPs in the stream of tones. Zero value *TP sensitivity* of a  
 130 channel indicates that the encoded information in the deviant responses is not affected by the TPs of the  
 131 events, whereas lower values imply a higher impact. Fig. 3a shows two example electrodes of high and  
 132 low *TP sensitivity* (each green dot represents a deviant trial). In the analysis, 61.53 % of the 785 channels  
 133 across all subjects showed a significant *TP sensitivity* (Fig. 3b & S3, permutation-based test, FDR cor-  
 134 rected). These channels tended to increase the amount of *encoded information* in the HFA response when  
 135 the likelihood of an event occurrence decreased (low TP) and conversely decreased the *encoded informa-*  
 136 *tion* for more expectable events (high TP). Notably, the *TP sensitivity* distributes over the brain (Fig. 3c).  
 137 Therefore we evaluated this distribution in terms of ROIs. Each ROI's *TP sensitivity* except for the ACC  
 138 were significantly lower than zero (one-tailed Wilcoxon signed-rank test, FDR corrected,  $p \leq 2.97e-2$ ,  
 139  $|z| \geq 1.89$ ), indicating that most ROIs were involved in the encoding of TPs (Fig. 3d). Importantly,  
 140 our results were consistent across participants. Out of the 22 subjects, an average of 52.10 % (95% CI  
 141 [47.19 %, 57.04 %]) showed a significant *TP sensitivity* across the ROIs (Fig. 3b & S4). Moreover, we  
 142 studied differences in the *TP sensitivity* across ROIs, where hippocampus and inferior frontal cortex  
 143 showed the greatest sensitivity to TPs (Fig. 3e, two-tailed Mann–Whitney–Wilcoxon tests,  $p \leq 4.37e-2$ ,  
 144  $|z| \geq 2.02$ ).

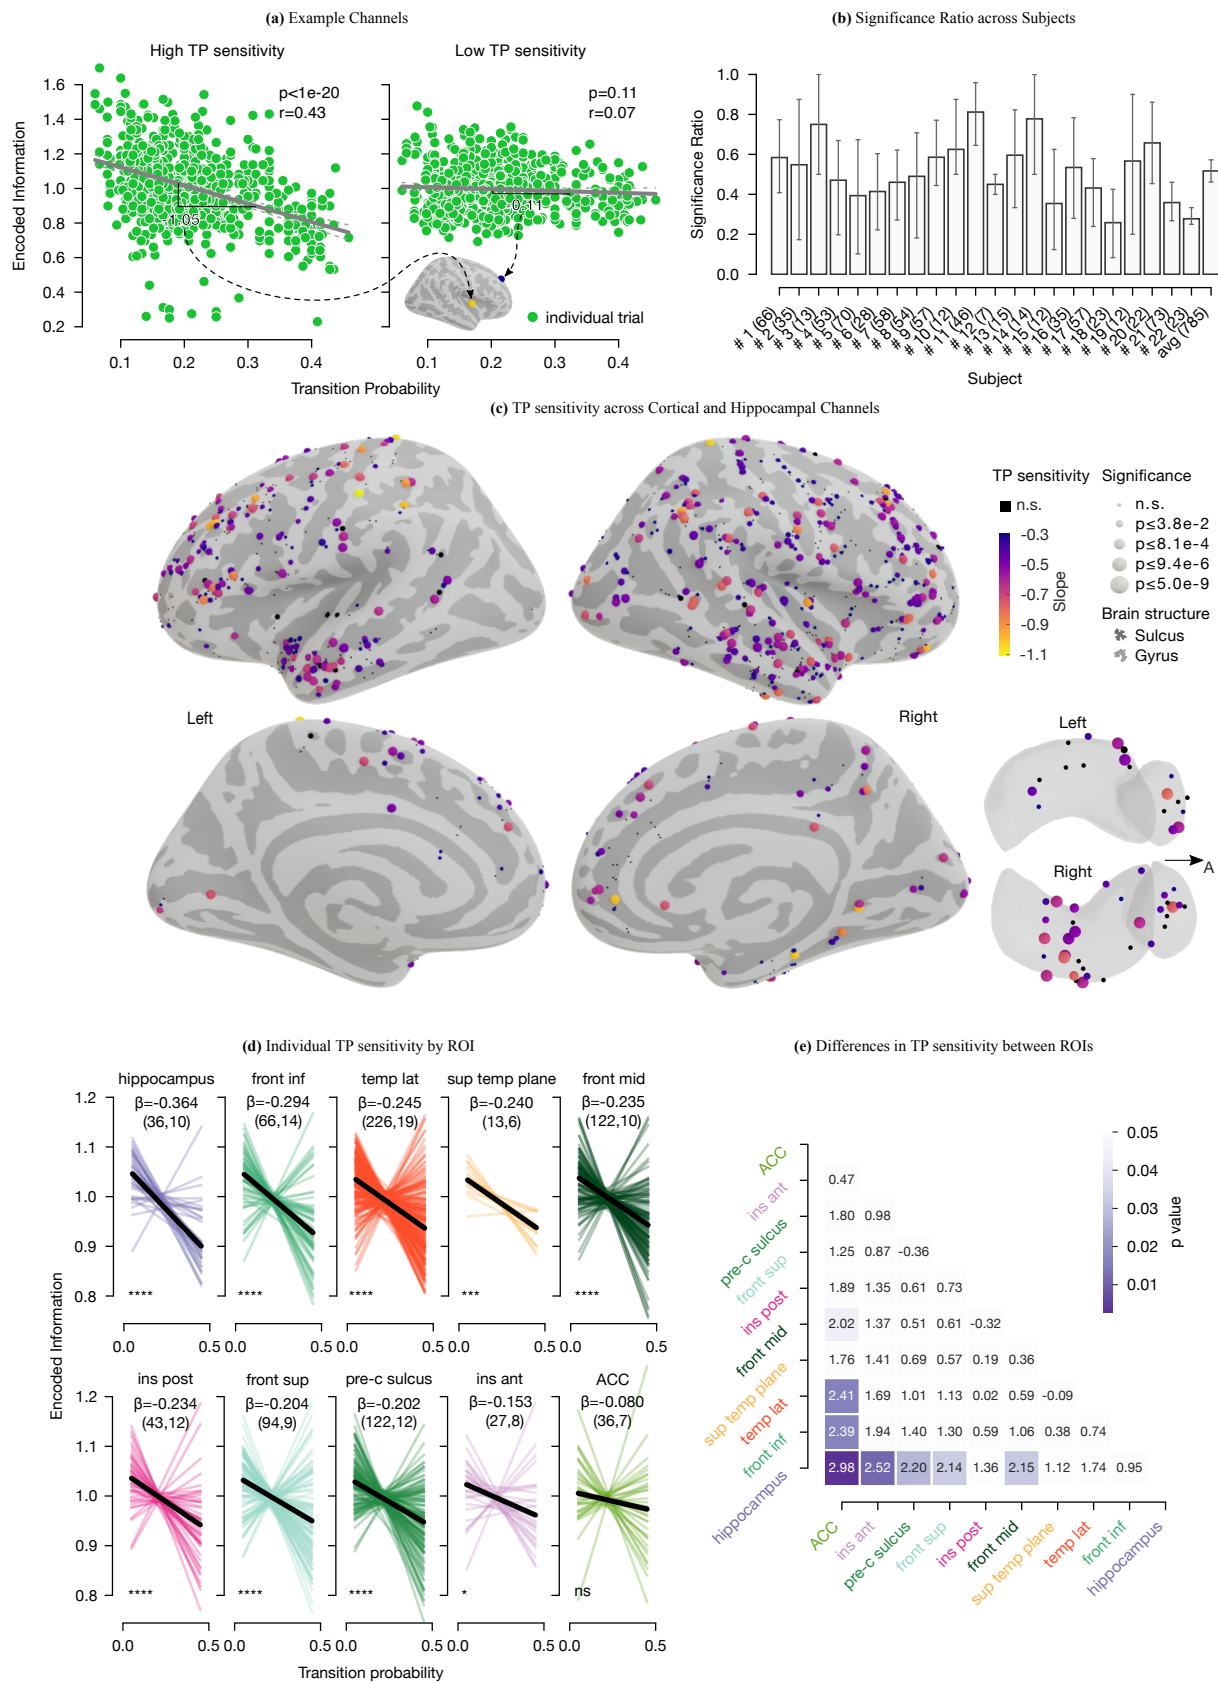

**Figure 3: TP sensitivity results.** **a:** Two example channels resulting from the robust linear regression between TPs and encoded information (each green dot represents a trial). For each channel, the encoded information values were normalized by their mean. The resulting slope indicates how sensitive a region underneath a contact point is towards the variation of TPs. The first channel shows a negative slope of -1.05. Thus, the more frequent a transition, the more the information encoded in the deviant response decreases. **b:** Ratio of the significant to total channels (number in brackets) across subjects. The error bars indicate the 95% CI across ROIs. **c:** Inflated brain model with lateral and medial views of the right and left hemispheres and a superior view of the amygdala and hippocampus. Each sphere represents a channel projected onto the surface. The colors indicate its TP sensitivity. TP sensitivities greater than -0.3 or within the first 25% of all values have the lowest color in the color gradient. The size of the spheres indicates the p-values of the slopes. They are divided such that each interval contains 1/4 of the p-value set. **d:** TP sensitivity by ROIs, where the individual TP sensitivities (regardless of significance) are colored. In black, the median TP sensitivity is shown (see  $\beta$  for its numerical value). The number of channels and subjects are given in parentheses in the subtitles. Except for the ACC, all ROIs show a significant median TP sensitivity (statistical significance of the slopes is indicated with "ns"  $p > 0.05$ , \*  $p \leq 5e-2$ , \*\*\*  $p \leq 1e-3$ , and \*\*\*\*  $p \leq 1e-4$ ). **e:** Matrix of z-values representing individual statistical differences of TP sensitivity between ROIs.

## 145 Discussion

146 We studied how humans passively listening to a multi-feature sequence of random sounds implicitly en-  
147 code conditional relations between sounds. Crucially, our results show that the auditory system embedded  
148 in a distributed hierarchical network continuously monitors the environment for potential saliency, main-  
149 taining and updating a neural representation of temporal relationships between events. This suggests that  
150 the brain continuously attempts to predict and provide structure from events in the environment, even  
151 when they are not behaviorally relevant and have no evident relation between them.

152 Participants demonstrated remarkable sensitivity to TPs. From a statistical learning perspective (de-  
153 fined as “all phenomena related to perceiving and learning any forms of patterning in the environment  
154 that are either spatial or temporal in nature” (54)), these findings suggest an implicit learning process in  
155 which TPs are internally inferred. On average, more frequent deviant transitions exhibited less encoded  
156 information in the HFA responses. Conversely, rarer transitions showed an increase in the encoded infor-  
157 mation (Fig. 3a & 2c). Consequently, these results indicate an encoding of TPs, consistent with previous  
158 studies using more structured and stationary stimuli in humans and non-humans (4, 11–23, 25, 41, 42, 45).  
159 In our study, we additionally point out that the brain also is sensitive to dynamic TP courses in a randomly  
160 structured sequence of varied auditory stimuli. The brain’s sensitivity to TPs within our random sequence  
161 suggests a more general mechanism that continuously encodes TPs between events in the environment.  
162 This critical mechanism forms the basis of a statistical learning system wherein the brain integrates ev-  
163 ery event into an internal representation of the environment based on the statistical relationship between  
164 events. Since *a priori* the presence of patterns within stimuli is unknown, the brain might automatically  
165 encode their TP to detect potential structure and violations of such. Artificial grammar learning studies,  
166 where subjects learn patterns of nonsense words, confirm the relevance of this TP encoding in language  
167 learning (16, 28, 29, 33, 55).

168 Following the notion of predictive coding, the encoded information in each deviant response can be  
169 interpreted as a bottom-up prediction error signal, i.e., the amount of information in each novel event  
170 not explained away by top-down prediction signals (5, 7, 42, 56). Consequently, low TP events, i.e.,  
171 less expected events, elicited a higher amount of encoded information and hence larger prediction errors  
172 derived from less accurate predictions. Accordingly, this information is used in higher cortical areas to  
173 update internal models for future predictions. On the other hand, high TP events, i.e., more expected  
174 events, elicited a lower amount of encoded information. This generates smaller prediction error signals  
175 and smaller updates of the internal models. Internal representations of TPs between events are fundamen-  
176 tal to build useful predictions of upcoming events rather than simpler frequentist representations (12, 24).  
177 However, there is a lack of studies investigating TPs in predictive processing in general, while in sta-  
178 tistical learning, there is a need for more neurophysiological studies. Our study takes a step forward in  
179 both of these directions, and shows that TPs might constitute a central statistic used by internal perceptual  
180 models at the core of predictive processing and statistical learning.

181 Our results provide novel evidence that the encoding of acoustic deviant transitions is anatomically  
182 distributed and not exclusively concentrated in auditory cortices (Fig. 3c). The automatic process of  
183 identifying temporal relationships is subserved by a network consisting of the hippocampus in concert  
184 with the inferior frontal, temporal, and insular cortices. Accordingly, by entailing multiple active brain  
185 regions, this network bundles findings from various prior statistical learning (28, 32) and predictive pro-  
186 cessing (6, 41) studies together.

187 Specifically, the hippocampus contributes most to temporal transition encoding between salient events.  
188 In contrast to other areas, hippocampal responses indicate high sensitivity to TPs while having a lower  
189 sensitivity to deviant tones (Fig. 2b & 3d). Accordingly, hippocampal activity may reflect a more generic  
190 context sensitivity to the events’ probabilistic structures, i.e., learning about event occurrences within a  
191 given structure itself instead of encoding actual deviating events (57). Our results provide new evi-  
192 dence for the role of the hippocampus during implicit learning, consistent with recent suggestions that  
193 this area is a rapid supramodal learner of arbitrary or higher-order associations in the sensory environ-  
194 ment (3, 16, 28, 32, 33, 39–41, 45, 58, 59). In a recent iEEG study presenting 12 syllables within an  
195 auditory stream, Henin et al. (16) observed that TPs are encoded in lower-order areas of the superior  
196 temporal plane and not in the hippocampus, which uniquely represented the identity (i.e., the specific

197 higher-order chunk such as a word) of their sequences. Therefore, the hippocampus did not appear to  
198 engage in forming the neural representation of TPs but performed operations that built upon them. We,  
199 on the contrary, found the hippocampus to be the main contributor among the cortical areas in encoding  
200 TPs. These differences might emerge because our study used passive listening with pure tones, while  
201 Henin et al. used active listening with syllables. Our results fit well with previous studies indicating the  
202 hippocampus' fundamental role in statistical learning and encoding stimuli uncertainty, both attended and  
203 unattended (3, 16, 28, 32, 33, 39–41, 43, 45, 57–60). According to that, the hippocampus might operate  
204 differently depending on task demands. By its domain-general learning mechanisms, possible hippocampal  
205 involvement could comprise indirect modulation of lower-level sensory areas or direct computations  
206 of hippocampal representations (28, 32).

207 We also observed sensitivity to transitions between events in the inferior frontal cortex. Evidence of  
208 inferior frontal involvement in statistics-driven learning processes is sparse (28, 33, 41) and mainly relies  
209 on explicit learning studies using fMRI (8, 44). However, it is commonly described in the deviance  
210 detection literature, where a role of a higher hierarchical node is attributed to this region (46, 48, 49).  
211 Evidence from non-human primates iEEG studies manipulating the predictability of events also supports  
212 this involvement by showing a spatially dispersed contribution of regions that includes the prefrontal  
213 cortex in both passive auditory (42) and active visual paradigms (6).

214 Notably, channels in the superior temporal plane showed the highest encoded information and a high  
215 TP sensitivity (Fig. 3d), suggesting a key role of the supratemporal plane in both the deviance detection  
216 and the implicit learning of transitions between salient auditory events. This is consistent with previous  
217 reports about this region being active in conditional statistical learning (17, 33, 44, 45, 61). Thus, per-  
218 ceptual processing of individual stimuli in low hierarchical areas might be strongly affected by learning  
219 temporal patterns in streams of stimuli (22, 23, 28, 62). This is possibly due to a local process, top-down  
220 modulations, or both. However, previous studies have shown that top-down information flow interacts  
221 with bottom-up information flow at all levels of the hierarchy (5, 6, 48, 49).

222 An unexpected observation was the significant TP sensitivity of individual channels in the occipital  
223 lobe, indicating a contribution to TP encoding of the auditory stimuli. It has been shown that during  
224 auditory oddball and statistical learning paradigms, attentional processing can activate visual processing  
225 regions, which are typically engaged in the perception of visual objects (16, 63, 64). When queried,  
226 all of our participants reported that they could focus on the reading material and did not pay attention  
227 to the tones. Hence, this leaves open whether this auditory occipital activation might also be observable  
228 during passive listening tasks and whether this is specific to the sensitivity of our HFA recording. Current  
229 evidence is sparse, but two previous studies on deviance detection during passive listening showed similar  
230 occipital effects using fMRI and scalp EEG (64, 65).

231 In terms of deviance detection, our results suggest a main involvement of the superior temporal plane  
232 and posterior insula (Fig. 2b). Previous studies on auditory deviance detection using iEEG, MEG/EEG  
233 source localization, and fMRI have shown similar responses to deviants over the supratemporal plane  
234 (1, 34, 47–49, 65–70), but detailed information for the insular cortex is sparse. In line with recent reports  
235 about its contribution to auditory processing (66, 71), we found that the posterior part showed larger  
236 encoded information than the anterior part. We also noticed that the ACC, middle frontal and pre-central  
237 sulcus moderately engaged in change detection. Although not often observed in auditory experiments,  
238 activation of these regions has been previously reported in the context of pre-attentive oddball paradigms  
239 with frequency (or duration) deviants using EEG (65, 65, 68, 72) or fMRI (64, 70). In our study, the  
240 ACC contributes to auditory change detection but did not reach a significant sensitivity to TP, generally  
241 consistent with previous reports (65, 72). It is presumably more involved in cognitive control or error  
242 detection, such as recognizing global patterns (47, 67). In our pre-attentive paradigm, we speculate that  
243 the ACC monitors the high-level structure of individual deviant occurrences rather than the automatic  
244 TP encoding. Further, areas lower in the hierarchy are more sensitive to deviant tones, and conversely,  
245 higher hierarchy locations exhibit lower encoded information values (Fig. 2c). Interestingly, our results  
246 indicate that the encoding of deviants was not strictly confined to specific areas, but distributed across  
247 multiple brain regions in a hierarchically organized manner. This suggests that lower hierarchical levels,  
248 which show a preferential representation of the stimuli, are more sensitive to the different deviant tones.

249 Together, these results are in line with studies on the hierarchical visual pathway which indicate that  
250 expectation suppression scales positively with image preference (73).

251 In our present study, we focused on the analysis of HFA, given that it captures fast fluctuations in iEEG.  
252 Aside from HFA, it might be especially worthwhile to consider lower frequency bands (e.g., alpha or beta)  
253 because these bands presumably carry information of predictions (5, 6). However, because iEEG repre-  
254 sents the population activity of spiking neurons, concerning lower and thus less fluctuating frequencies,  
255 iEEG macroelectrodes may miss less prominent activity patterns of a minority of neurons (1).

256 Our work provides a comprehensive picture of neural correlates of statistical learning, which, before,  
257 were bundled together from multiple studies (28, 33, 45). Additionally, our setup shares similarities in  
258 common with language learning studies. Yet, the implications of our findings may be limited because our  
259 paradigm is implicit and employs pure tones. One possibility to account for this is to replace pure tones  
260 with syllables or chunks of sounds. Also, given the presumably different roles of brain regions during  
261 implicit and active learning tasks (16, 28), active exposure to our sound train could potentially allow a  
262 more direct comparison between brain regions, or to language learning studies.

263 Having ascertained implicit learning analytically through algorithmic information theory and having  
264 determined neural substrates that imply a cortical network of brain regions, we are now in the position to  
265 explore its underlying mechanisms and regional influences further. Specifically, adding lower frequency  
266 bands to our analysis would enable us to disentangle the distinct roles in information encoding and pre-  
267 dictability signaling of sensory inputs. While having a lower HFA, evoked responses to predictable events  
268 might exhibit a higher alpha or beta activity (5, 6, 42). Accordingly, in the case of more frequently oc-  
269 ccurring, and thus more predictable transitions, there might be an alternative cascade of involved regions  
270 anchored in higher cortical areas. In that respect, it might be especially worthwhile to evaluate the pre-  
271 onset sound interval of event responses, phase-amplitude coupling or connectivity across ROIs.

272 Taken together, direct brain recordings reveal continuous encoding of structure in random stimuli.  
273 While automatically assessing the deviance of events, the brain simultaneously identifies patterns by  
274 encoding conditional relations between events, supporting both statistical learning and predictive coding  
275 frameworks. This implicit process involves, in addition to the hippocampus, inferior frontal cortices,  
276 pure sensory areas, and other cortical regions.

## 277 **Methods**

### 278 **Stimuli**

279 An unattended listening task following a multi-dimensional auditory oddball paradigm was used (48, 49,  
280 74). The task consisted of a standard and five different deviant tones (Fig. 1). Standards had a duration  
281 of 75 ms with 7 ms up and down ramps and consisted of three sinusoidal partials of 500, 1000, and  
282 1500 Hz. Deviants varied relative to the standard in the perceived sound-source location (left or right),  
283 intensity ( $\pm 6$  dB), frequency (550, 1100, and 1650 Hz or 450, 900, and 1350 Hz), gap (25 ms silence in  
284 the middle), or by a shortened duration ( $1/3$  or 25 ms shorter). Thus there were two stimuli versions for  
285 location, intensity, and frequency deviants. During the sequence, each standard tone was followed by a  
286 deviant tone. The deviant tone type was set up such that within a set of five consecutive deviants, each of  
287 the five types was presented once. In consecutive sets, the same deviant type did not repeat from the end  
288 of one set to the beginning of another. For the three deviants that had two stimuli versions, each version  
289 occurred equally often ( $P=0.5$ ). Except for deviants varying in duration, all tones had a duration of 75 ms  
290 and were presented every 500 ms in blocks of 5 min consisting of 300 standards and 300 deviants. At  
291 the beginning of each block, 15 standards were played. To capture automatic, stimulus-driven processes,  
292 participants were asked not to pay attention to the sounds while reading a book or magazine. They  
293 completed 3 to 10 blocks, providing at least 1800 trials. Tones were presented through headphones using  
294 Psychtoolbox-3 (75).



## 295 **Participants**

296 We recorded data from 22 (self-reported) normal-hearing adults with drug-resistant epilepsy who were  
297 potential candidates for resective surgery of epileptogenic tissue (mean age 31 years, range 19 to 50 years,  
298 6 female). Patients underwent invasive intracranial electrocorticography (ECoG) or stereoelectroen-  
299 cephalography (SEEG) recordings as part of their pre-surgical evaluation. Intracranial electrodes were  
300 temporarily implanted to localize the epileptogenic zone and eloquent cortex. The number and placement  
301 of electrodes were guided exclusively by clinical requirements. Data were collected at El Cruce Hospital  
302 (n=15) and Oslo University Hospital (n=7).

## 303 **Data Acquisition**

304 Pre-implantation structural MRI and post-implantation CT scans were acquired for each participant.  
305 ECoG or SEEG data were recorded using an Elite (Blackrock NeuroMed LLC, USA), a NicoletOne  
306 (Nicolet, Natus Neurology Inc., USA), or an ATLAS (Neuralynx, USA) system with sampling frequen-  
307 cies of 2000, 512, and 16 000 Hz, respectively.

## 308 **Electrode Localization**

309 Post-implantation CT images were co-registered to pre-implantation MRI images using SPM12 (76).  
310 MRI images were processed using the FreeSurfer standard pipeline (77), and individual cortical parcel-  
311 lation images were obtained through the Destrieux atlas (78). Electrode coordinates were obtained with  
312 the iElectrodes Toolbox (79). Anatomical labels were automatically assigned to each contact based on  
313 the Destrieux atlas using the aforementioned toolboxes and confirmed by a neurologist/neurosurgeon.  
314 Coordinates were projected to the closest point on the pial surface (within 3 mm) and then coregistered  
315 to a normalized space using surface-based spherical coregistration (80).

## 316 **Signal-preprocessing**

317 Monopolar intracranial EEG recordings were visually inspected and channels or epochs showing epilep-  
318 tiform activity or other abnormal signals were removed. Signals from electrodes located in lesional tissue  
319 or tissue that was later resected were also excluded. Bipolar channels were computed as the difference  
320 between signals recorded from pairs of neighboring electrodes in the same electrode array. In our study,  
321 we refer to these bipolar channels as "channels". Data were low-pass filtered at 180 Hz, and line noise  
322 was removed using bandstop filters at 50, 100, and 150 Hz. Data were then segmented into 2000 ms  
323 epochs (750 ms before and 1250 ms after tone onset) and demeaned. We manually inspected and rejected  
324 epochs after bipolar re-referencing. To eliminate any residual artifact, we rejected trials with an amplitude  
325 larger than 5 SD from the mean for more than 25 consecutive ms, or with a power spectral density above  
326 5 SD from the mean for more than 6 consecutive Hz. An average of 35 % of the trials were rejected,  
327 resulting in an average of 1592 trials analyzed per patient (range 728 to 3723). Data were resampled to  
328 1000 Hz. Pre-processing and statistical analysis were performed in Matlab using the Fieldtrip Toolbox  
329 (81) and custom code. To obtain the HFA, preprocessed data were bandpass filtered into eight consec-  
330 utive bands of 10 Hz bandwidth ranging from 75 to 145 Hz. The Hilbert transform was then applied to  
331 each filtered signal to obtain the complex-valued analytic time series, and the modulus of these signals  
332 computed to retain the analytic amplitude time series. Trials were baseline corrected (-100 to 0 ms) for  
333 each frequency band, and then the bands were averaged, producing a single time series per trial. Finally,  
334 for each channel, all trial time series were divided by the standard deviation pulled from all trials in the  
335 baseline period. For more information, see (66, Chap. 2).

## 336 **Encoded Information**

337 We estimated the information content of HFA responses by employing the concept of Algorithmic In-  
338 formation Theory. This theory anchors in Algorithmic Complexity or Kolmogorov Complexity (K-  
339 complexity). The K-complexity is the ultimate compressed version or minimum description length of

340 an object, i.e., its absolute information content (82). If the minimum description length is short (long), an  
341 object is characterized as "simple" ("complex"). Because it is not possible to compute the theoretically  
342 ideal K-complexity, it is often heuristically estimated, obtaining an upper-bound approximation. Possible  
343 estimation approaches are conventional lossless data compression programs, e.g., gzip (82, 83).

Based on the K-complexity, various metrics were derived. One instance is the Normalized Information Distance or its estimation counterpart, the Normalized Compression Distance (NCD). The NCD allows to compare different pairs of objects with each other and suggests similarity based on their dominating features (or a mixture of sub-features) (82, 83). For a pair of strings  $(x, y)$ , the  $NCD(x, y)$  is defined as

$$NCD(x, y) = \frac{C(xy) - \min(C(x), C(y))}{\max(C(x), C(y))},$$

344 with  $C(xy)$  denoting the compressed size of the concatenation of  $x$  and  $y$ , and  $C(x)$  and  $C(y)$  their respec-  
345 tive size after compression (82, 83). Further, the NCD is non-negative, that is, it is  $0 \leq NCD(x, y) \leq 1 + \epsilon$ ,  
346 where the  $\epsilon$  accounts for the imperfection of the employed compression technique. Small NCD values  
347 suggest similar objects, and high values suggest rather different objects.

348 For each channel, we defined single-trial *encoded information* for each deviant response by computing  
349 the NCD measure between the HFA deviant response and the channel-specific mean HFA standard re-  
350 sponse (Fig. 1). Before their compression, HFA responses were represented by grouping their values into  
351 128 discrete steps (bins). The bins covered equal distances and in a range between the global extrema  
352 of all trials considered. The compressor then received the indices of the bins that contained the ele-  
353 ments of the signals (84, 85). Compression proceeded through a compression routine based on Python's  
354 standard library and gzip. To account for the differences in auditory sound processing across channels  
355 the trial-specific encoded information values were normalized in terms of the channel mean of encoded  
356 information for the TP sensitivity analysis.

## 357 Transitional Probability

We estimated conditional statistics describing the inter-sound relationship through TPs between adjacent deviant tones. After each deviant tone presentation (Fig. 1), TPs were determined through estimating their maximum-likelihood (14, 25, 26, 86), i.e., through

$$TP = P(Y|X) = \frac{\text{frequency}(XY)}{\text{frequency}(X)},$$

358 for each event-to-event combination  $X$  or  $Y$ . For each time step, resulting TPs were then stored in a  
359 TP matrix (stochastic matrix of size  $\mathbb{R}^{8 \times 8}$ ).

## 360 Anatomical Hierarchy

361 Human T1w/T2w maps were obtained from the Human Connectome Project (53). The maps were then  
362 converted from the surface-based CIFTI file format to the MNI-152 inflated cortical surface template with  
363 Workbench Command (87). The structural neuroimaging maps are suggested to be a measure sensitive  
364 to regional variation in cortical gray-matter myelin content (51). One function of myelin might be to act  
365 as an inhibitor of intra-cortical circuit plasticity. Early sensory areas may require less plasticity, hence  
366 more myelination, and hierarchically higher association areas, in turn, have less myelination, presumably  
367 enabling greater plasticity (88). Accordingly, T1w/T2w maps may serve as a non-invasive proxy of  
368 anatomical hierarchy across the human cortex through an inverse relationship. The anatomical hierarchy  
369 can be defined as a global ordering of cortical areas corresponding to characteristic laminar patterns of  
370 inter-areal projections (5, 51, 52). To directly work with the hierarchy ordering, T1w/T2w maps were  
371 inverted and normalized to the value range of our data set.

## 372 Statistical Analysis

373 For the statistical analysis, the first 30 trials of each recording block were disregarded. By that we aimed to  
374 exclude the initial phase of the experiment that potentially biases our correlation analysis. To estimate the

375 TP sensitivity of a channel, the eight distinct tone types were grouped into one regressor. Subsequently,  
376 robust linear regression was performed in Matlab (Fig. 1 & 3a), where TP values greater than 0.7 were  
377 excluded. For the regression, an alpha value of 0.05 was considered significant. To correct for multiple  
378 comparisons, false discovery rate (FDR) adjustment was applied with an FDR of 0.05. Further, our linear  
379 regression model examined the relationship between information content and TPs of all adjacent deviant  
380 transitions. For this reason, we performed surrogate data testing for uncorrelated noise on the regression  
381 models by building shuffled surrogates of the regressor variables encoded information and TP (Fig. S3).

## 382 **Ethics Approval and Consent to Participate**

383 This study was approved by the Research Ethics Committee of El Cruce Hospital, Argentina, and the  
384 Regional Committees for Medical and Health Research Ethics, Region North Norway. Patients gave  
385 written informed consent prior to participation.

## 386 **Data Availability**

387 The study in this article earned Open Materials for transparent practices . Materials for the experimental  
388 scripts and stimuli, and custom analysis code is available at [osf.io/2n6c9](https://osf.io/2n6c9). Due to the confidential nature of the  
389 data, the patients' datasets analyzed for the current study are not publicly available. Our ethical approval  
390 conditions that do not permit public archiving of study data. Readers seeking access to the data supporting  
391 the claims in this paper should contact the corresponding author Alejandro Blenkmann, Department of  
392 Psychology, University of Oslo; the Research Ethics Committee of El Cruce Hospital, Argentina; and  
393 the Regional Committees for Medical and Health Research Ethics, Region North Norway. Requests  
394 must meet the following specific conditions to obtain the data: a collaboration agreement, data sharing  
395 agreement, and a formal ethical approval.

## 397 **Acknowledgments**

398 We thank the patients for kindly participating in our study. We want to express our gratitude to the  
399 EEG technicians at El Cruce Hospital and Oslo University Hospital-Rikshospitalet for their support. We  
400 thank Yamil Vidal, Fernando Rosas, and RITMO colleagues for rich discussions. This work was partly  
401 supported by the Research Council of Norway (RCN) through its Centres of Excellence scheme project  
402 number 262762, RCN project number 240389 and 314925, NINDS Grant R37NS21135, NIMH CONTE  
403 Center P50MH109429, and Brain Initiative U01-NS108916.

## 404 **Author contributions**

405 JF, AOB, AKS, and TE designed this study. AOB carried out the experiment and collected the data. JF  
406 and AOB performed the analyses. TE, AKS, SK, and TB provided the data. JI implanted and reviewed  
407 depth electrodes. JF, AOB, KG, TE, AKS, and RTK contributed to the interpretation of the results. JF  
408 wrote the manuscript with inputs from AOB, KG, TE, and RTK. All authors revised the manuscript. All  
409 authors read and approved the final manuscript.

## 410 **Competing interests**

411 The authors declare no conflict of interests.

## 412 **References**

- 413 1. S. Dürschmid, E. Edwards, C. Reichert, C. Dewar, H. Hinrichs, H.-J. Heinze, H. E. Kirsch, S. S. Dalal, L. Y. Deouell, and  
414 R. T. Knight, "Hierarchy of prediction errors for auditory events in human temporal and frontal cortex," *Proceedings of the*  
415 *National Academy of Sciences*, vol. 113, no. 24, pp. 6755–6760, 2016.
- 416 2. P. Paavilainen, "The mismatch-negativity (mmn) component of the auditory event-related potential to violations of abstract  
417 regularities: A review," *International Journal of Psychophysiology*, vol. 88, no. 2, pp. 109 – 123, 2013.

- 418 3. E. D. Thiessen, “What’s statistical about learning? insights from modelling statistical learning as a set of memory pro-  
419 cesses,” *Philosophical Transactions of the Royal Society B: Biological Sciences*, vol. 372, no. 1711, p. 20160056, 2017.
- 420 4. J. R. Saffran, R. N. Aslin, and E. L. Newport, “Statistical learning by 8-month-old infants,” *Science*, vol. 274, no. 5294,  
421 pp. 1926–1928, 1996.
- 422 5. A. M. Bastos, J. Vezoli, C. Bosman, J.-M. Schoffelen, R. Oostenveld, J. Dowdall, P. De Weerd, H. Kennedy, and P. Fries,  
423 “Visual areas exert feedforward and feedback influences through distinct frequency channels,” *Neuron*, vol. 85, no. 2, pp.  
424 390 – 401, 2015.
- 425 6. A. M. Bastos, M. Lundqvist, A. S. Waite, N. Kopell, and E. K. Miller, “Layer and rhythm specificity for predictive routing,”  
426 *Proceedings of the National Academy of Sciences*, vol. 117, no. 49, pp. 31 459–31 469, 2020.
- 427 7. K. Friston, “The free-energy principle: A unified brain theory?” *Nature Reviews Neuroscience*, vol. 11, no. 2, pp. 127–138,  
428 2010.
- 429 8. S. A. Huettel, P. B. Mack, and G. McCarthy, “Perceiving patterns in random series: dynamic processing of sequence in  
430 prefrontal cortex,” *Nature Neuroscience*, vol. 5, no. 5, pp. 1546–1726, 2002.
- 431 9. R. Falk and C. Konold, “Making Sense of Randomness: Implicit Encoding as a Basis for Judgment,” *Psychological Review*,  
432 vol. 104, no. 2, pp. 301–318, 1997.
- 433 10. U. Hahn and P. A. Warren, “Perceptions of Randomness: Why Three Heads Are Better Than Four,” *Psychological Review*,  
434 vol. 116, no. 2, pp. 454–461, 2009.
- 435 11. S. Koelsch, T. Busch, S. Jentschke, and M. Rohrmeier, “Under the hood of statistical learning: A statistical mnm reflects  
436 the magnitude of transitional probabilities in auditory sequences,” *Scientific Reports*, vol. 6, pp. 2045–2322, 02 2016.
- 437 12. M. Mittag, R. Takegata, and I. Winkler, “Transitional probabilities are prioritized over stimulus/pattern probabilities in  
438 auditory deviance detection: Memory basis for predictive sound processing,” *Journal of Neuroscience*, vol. 36, no. 37, pp.  
439 9572–9579, 2016.
- 440 13. H. Higashi, T. Minami, and S. Nakauchi, “Variation in event-related potentials by state transitions,” *Frontiers in Human  
441 Neuroscience*, vol. 11, p. 75, 2017.
- 442 14. F. Meyniel, M. Maheu, and S. Dehaene, “Human inferences about sequences: A minimal transition probability model,”  
443 *PLOS Computational Biology*, vol. 12, no. 12, pp. 1–26, 2016.
- 444 15. M. K. Leonard, K. E. Bouchard, C. Tang, and E. F. Chang, “Dynamic encoding of speech sequence probability in human  
445 temporal cortex,” *Journal of Neuroscience*, vol. 35, no. 18, pp. 7203–7214, 2015.
- 446 16. S. Henin, N. B. Turk-Browne, D. Friedman, A. Liu, P. Dugan, A. Flinker, W. Doyle, O. Devinsky, and L. Melloni, “Learning  
447 hierarchical representations across human cortex and hippocampus,” *Science Advances*, vol. 7, no. 8, 2021.
- 448 17. F. Meyniel and S. Dehaene, “Brain networks for confidence weighting and hierarchical inference during probabilistic learn-  
449 ing,” *Proceedings of the National Academy of Sciences*, vol. 114, no. 19, pp. E3859–E3868, 2017.
- 450 18. P. Domenech and J.-C. Dreher, “Decision threshold modulation in the human brain,” *Journal of Neuroscience*, vol. 30,  
451 no. 43, pp. 14 305–14 317, 2010.
- 452 19. P. Maguire, P. Moser, R. Maguire, and M. T. Keane, “Seeing patterns in randomness: A computational model of surprise,”  
453 *Topics in Cognitive Science*, vol. 11, no. 1, pp. 103–118, 2019.
- 454 20. M. Maheu, F. Meyniel, and S. Dehaene, “Rational arbitration between statistics and rules in human sequence learning,”  
455 *bioRxiv*, vol. 1, no. 1, 2020.
- 456 21. F. Meyniel, D. Schlunegger, and S. Dehaene, “The sense of confidence during probabilistic learning: A normative account,”  
457 *PLOS Computational Biology*, vol. 11, no. 6, pp. 1–25, 06 2015.
- 458 22. A. Yaron, I. Hershenhoren, and I. Nelken, “Sensitivity to complex statistical regularities in rat auditory cortex,” *Neuron*,  
459 vol. 76, no. 3, pp. 603 – 615, 2012.
- 460 23. K. Lu and D. S. Vicario, “Statistical learning of recurring sound patterns encodes auditory objects in songbird forebrain,”  
461 *Proceedings of the National Academy of Sciences*, vol. 111, no. 40, pp. 14 553–14 558, 2014.
- 462 24. M. Maheu, S. Dehaene, and F. Meyniel, “Brain signatures of a multiscale process of sequence learning in humans,” *eLife*,  
463 vol. 8, p. e41541, 2019.
- 464 25. B. Pelucchi, J. F. Hay, and J. R. Saffran, “Learning in reverse: Eight-month-old infants track backward transitional proba-  
465 bilities,” *Cognition*, vol. 113, no. 2, pp. 244 – 247, 2009.
- 466 26. S. P. Thompson and E. L. Newport, “Statistical learning of syntax: The role of transitional probability,” *Language Learning  
467 and Development*, vol. 3, no. 1, pp. 1–42, 2007.
- 468 27. J. R. Saffran, “Statistical language learning in infancy,” *Child Development Perspectives*, vol. 14, no. 1, pp. 49–54, 2020.
- 469 28. C. M. Conway, “How does the brain learn environmental structure? ten core principles for understanding the neurocognitive  
470 mechanisms of statistical learning,” *Neuroscience & Biobehavioral Reviews*, vol. 112, pp. 279 – 299, 2020.
- 471 29. S. Dehaene, F. Meyniel, C. Wacongne, L. Wang, and C. Pallier, “The neural representation of sequences: From transition  
472 probabilities to algebraic patterns and linguistic trees,” *Neuron*, vol. 88, no. 1, pp. 2 – 19, 2015.
- 473 30. L. H. Arnal and A.-L. Giraud, “Cortical oscillations and sensory predictions,” *Trends in Cognitive Sciences*, vol. 16, no. 7,  
474 pp. 390–398, 2012.
- 475 31. J. R. Saffran and N. Z. Kirkham, “Infant statistical learning,” *Annual Review of Psychology*, vol. 69, no. 1, pp. 181–203,  
476 2018.
- 477 32. R. Frost, B. C. Armstrong, N. Siegelman, and M. H. Christiansen, “Domain generality versus modality specificity: The  
478 paradox of statistical learning,” *Trends in Cognitive Sciences*, vol. 19, no. 3, pp. 117–125, 2015.
- 479 33. J. N. Williams, “The neuroscience of implicit learning,” *Language Learning*, vol. 70, no. S2, pp. 255–307, 2020.
- 480 34. M. Heilbron and M. Chait, “Great expectations: Is there evidence for predictive coding in auditory cortex?” *Neuroscience*,  
481 vol. 389, pp. 54–73, 2018, sensory Sequence Processing in the Brain.

- 482 35. S. L. Denham and I. Winkler, “Predictive coding in auditory perception: challenges and unresolved questions,” *European*  
483 *Journal of Neuroscience*, vol. 51, no. 5, pp. 1151–1160, 2020.
- 484 36. G. V. Carbajal and M. S. Malmierca, “The neuronal basis of predictive coding along the auditory pathway: From the  
485 subcortical roots to cortical deviance detection,” *Trends in Hearing*, vol. 22, p. 2331216518784822, 2018.
- 486 37. J. Rubin, N. Ulanovsky, I. Nelken, and N. Tishby, “The representation of prediction error in auditory cortex,” *PLOS Com-*  
487 *putational Biology*, vol. 12, no. 8, pp. 1–28, 08 2016.
- 488 38. J. Daltrozzi and C. M. Conway, “Neurocognitive mechanisms of statistical-sequential learning: what do event-related  
489 potentials tell us?” *Frontiers in Human Neuroscience*, vol. 8, p. 437, 2014.
- 490 39. N. V. Covington, S. Brown-Schmidt, and M. C. Duff, “The necessity of the hippocampus for statistical learning,” *Journal*  
491 *of Cognitive Neuroscience*, vol. 30, no. 5, pp. 680–697, 2018.
- 492 40. A. C. Schapiro, E. Gregory, B. Landau, M. McCloskey, and N. B. Turk-Browne, “The Necessity of the Medial Temporal  
493 Lobe for Statistical Learning,” *Journal of Cognitive Neuroscience*, vol. 26, no. 8, pp. 1736–1747, aug 2014.
- 494 41. N. Barascud, M. T. Pearce, T. D. Griffiths, K. J. Friston, and M. Chait, “Brain responses in humans reveal ideal observer-like  
495 sensitivity to complex acoustic patterns,” *Proceedings of the National Academy of Sciences*, vol. 113, no. 5, pp. E616–E625,  
496 2016.
- 497 42. Z. C. Chao, K. Takaura, L. Wang, N. Fujii, and S. Dehaene, “Large-scale cortical networks for hierarchical prediction and  
498 prediction error in the primate brain,” *Neuron*, vol. 100, no. 5, pp. 1252–1266.e3, 2018.
- 499 43. Y. Kikuchi, A. Attaheri, B. Wilson, A. E. Rhone, K. V. Nourski, P. E. Gander, C. K. Kovach, H. Kawasaki, T. D. Griffiths,  
500 M. A. Howard, III, and C. I. Petkov, “Sequence learning modulates neural responses and oscillatory coupling in human and  
501 monkey auditory cortex,” *PLOS Biology*, vol. 15, no. 4, pp. 1–32, 04 2017.
- 502 44. E. A. Karuza, E. L. Newport, R. N. Aslin, S. J. Starling, M. E. Tivarus, and D. Bavelier, “The neural correlates of statistical  
503 learning in a word segmentation task: An fMRI study,” *Brain and Language*, vol. 127, no. 1, pp. 46–54, 2013.
- 504 45. T. Daikoku, “Neurophysiological markers of statistical learning in music and language: Hierarchy, entropy, and uncer-  
505 tainty,” *Brain Sciences*, vol. 8, p. 114, 06 2018.
- 506 46. S. Dürschmid, C. Reichert, H. Hinrichs, H.-J. Heinze, H. E. Kirsch, R. T. Knight, and L. Y. Deouell, “Direct Evidence for  
507 Prediction Signals in Frontal Cortex Independent of Prediction Error,” *Cerebral Cortex*, 2018.
- 508 47. T. A. Bekinschtein, S. Dehaene, B. Rohaut, F. Tadel, L. Cohen, and L. Naccache, “Neural signature of the conscious  
509 processing of auditory regularities,” *Proceedings of the National Academy of Sciences*, vol. 106, no. 5, pp. 1672–1677,  
510 2009.
- 511 48. H. N. Phillips, A. Blenkman, L. E. Hughes, T. A. Bekinschtein, and J. B. Rowe, “Hierarchical organization of frontotem-  
512 poral networks for the prediction of stimuli across multiple dimensions,” *Journal of Neuroscience*, vol. 35, no. 25, pp.  
513 9255–9264, 2015.
- 514 49. H. N. Phillips, A. Blenkman, L. E. Hughes, S. Kochen, T. A. Bekinschtein, Cam-CAN, and J. B. Rowe, “Convergent  
515 evidence for hierarchical prediction networks from human electrocorticography and magnetoencephalography,” *Cortex*,  
516 vol. 82, pp. 192–205, 2016.
- 517 50. C. Wacongne, J.-P. Changeux, and S. Dehaene, “A Neuronal Model of Predictive Coding Accounting for the Mismatch  
518 Negativity,” *Journal of Neuroscience*, vol. 32, no. 11, pp. 3665–3678, 2012.
- 519 51. J. B. Burt, M. Demirtaş, W. J. Eckner, N. M. Navejar, J. L. Ji, W. J. Martin, A. Bernacchia, A. Anticevic, and J. D. Murray,  
520 “Hierarchy of transcriptomic specialization across human cortex captured by structural neuroimaging topography,” *Nature*  
521 *neuroscience*, vol. 21, no. 9, p. 1251–1259, 09 2018.
- 522 52. N. T. Markov, J. Vezoli, P. Chameau, A. Falchier, R. Quilodran, C. Huissoud, C. Lamy, P. Misery, P. Giroud, S. Ullman,  
523 P. Barone, C. Dehay, K. Knoblauch, and H. Kennedy, “Anatomy of hierarchy: Feedforward and feedback pathways in  
524 macaque visual cortex,” *Journal of Comparative Neurology*, vol. 522, no. 1, pp. 225–259, 2014.
- 525 53. M. Glasser, T. Coalson, E. Robinson, C. Hacker, J. Harwell, E. Yacoub, K. Ugurbil, J. Andersson, C. Beckmann, M. Jenk-  
526 inson, S. Smith, and D. Van Essen, “A multi-modal parcellation of human cerebral cortex,” *Nature*, vol. 536, pp. 171–178,  
527 07 2016.
- 528 54. R. Frost, B. C. Armstrong, and M. H. Christiansen, “Statistical learning research: A critical review and possible new  
529 directions,” *Psychological Bulletin*, vol. 145, no. 12, pp. 1128–1153, 2019.
- 530 55. Y. Vidal, P. Brusini, M. Bonfieni, J. Mehler, and T. A. Bekinschtein, “Neural signal to violations of abstract rules using  
531 speech-like stimuli,” *eNeuro*, vol. 6, no. 5, 2019.
- 532 56. K. S. Walsh, D. P. McGovern, A. Clark, and R. G. O’Connell, “Evaluating the neurophysiological evidence for predictive  
533 processing as a model of perception,” *Annals of the New York Academy of Sciences*, vol. 1464, no. 1, pp. 242–268, 2020.
- 534 57. B. A. Strange, A. Duggins, W. Penny, R. J. Dolan, and K. J. Friston, “Information theory, novelty and hippocampal re-  
535 sponses: Unpredicted or unpredictable?” *Neural Networks*, vol. 18, no. 3, pp. 225–230, 2005.
- 536 58. N. B. Turk-Browne, B. J. Scholl, M. M. Chun, and M. K. Johnson, “Neural evidence of statistical learning: Efficient  
537 detection of visual regularities without awareness,” *Journal of Cognitive Neuroscience*, vol. 21, no. 10, pp. 1934–1945,  
538 2009.
- 539 59. A. C. Schapiro, N. B. Turk-Browne, K. A. Norman, and M. M. Botvinick, “Statistical learning of temporal community  
540 structure in the hippocampus,” *Hippocampus*, vol. 26, no. 1, pp. 3–8, 2016.
- 541 60. L. Harrison, A. Duggins, and K. Friston, “Encoding uncertainty in the hippocampus,” *Neural Networks*, vol. 19, no. 5, pp.  
542 535–546, 2006.
- 543 61. K. McNealy, J. C. Mazziotta, and M. Dapretto, “Cracking the language code: Neural mechanisms underlying speech  
544 parsing,” *Journal of Neuroscience*, vol. 26, no. 29, pp. 7629–7639, 2006.
- 545 62. A. H. Bell, C. Summerfield, E. L. Morin, N. J. Malecek, and L. G. Ungerleider, “Encoding of stimulus probability in  
546 macaque inferior temporal cortex,” *Current Biology*, vol. 26, no. 17, pp. 2280–2290, 2016.

- 547 63. J. J. McDonald, V. S. Störmer, A. Martinez, W. Feng, and S. A. Hillyard, “Salient sounds activate human visual cortex  
548 automatically,” *Journal of Neuroscience*, vol. 33, no. 21, pp. 9194–9201, 2013.
- 549 64. C. Justen and C. Herbert, “The spatio-temporal dynamics of deviance and target detection in the passive and active auditory  
550 oddball paradigm: A sLORETA study,” *BMC Neuroscience*, vol. 19, no. 1, pp. 1–18, 2018.
- 551 65. S. Molholm, A. Martinez, W. Ritter, D. C. Javitt, and J. J. Foxe, “The neural circuitry of pre-attentive auditory change-  
552 detection: An fMRI study of pitch and duration mismatch negativity generators,” *Cerebral Cortex*, vol. 15, no. 5, pp.  
553 545–551, 2005.
- 554 66. A. O. Blenkmann, S. Collavini, J. Lubell, A. Llorens, I. Funderud, J. Ivanovic, P. G. Larsson, T. R. Meling, T. Bekinschtein,  
555 S. Kochen, T. Endestad, R. T. Knight, and A.-K. Solbakk, “Auditory deviance detection in the human insula: An intracranial  
556 eeg study,” *Cortex*, vol. 121, pp. 189 – 200, 2019.
- 557 67. C. Wacongne, E. Labyt, V. van Wassenhove, T. Bekinschtein, L. Naccache, and S. Dehaene, “Evidence for a hierarchy of  
558 predictions and prediction errors in human cortex,” *Proceedings of the National Academy of Sciences*, vol. 108, no. 51, pp.  
559 20 754–20 759, 2011.
- 560 68. C. F. Doeller, B. Opitz, A. Mecklinger, C. Krick, W. Reith, and E. Schröger, “Prefrontal cortex involvement in preattentive  
561 auditory deviance detection: neuroimaging and electrophysiological evidence,” *NeuroImage*, vol. 20, no. 2, pp. 1270 –  
562 1282, 2003.
- 563 69. M. H. Giard, J. Lavikahen, K. Reinikainen, F. Perrin, O. Bertrand, J. Pernier, and R. Näätänen, “Separate representation  
564 of stimulus frequency, intensity, and duration in auditory sensory memory: An event-related potential and dipole-model  
565 analysis,” *Journal of Cognitive Neuroscience*, vol. 7, no. 2, pp. 133–143, 1995.
- 566 70. L. Y. Deouell, “The frontal generator of the mismatch negativity revisited,” *Journal of Psychophysiology*, vol. 21, no. 3-4,  
567 pp. 188–203, 2007.
- 568 71. Y. Zhang, W. Zhou, S. Wang, Q. Zhou, H. Wang, B. Zhang, J. Huang, B. Hong, and X. Wang, “The Roles of Subdivisions  
569 of Human Insula in Emotion Perception and Auditory Processing,” *Cerebral Cortex*, vol. 29, no. 2, pp. 517–528, 01 2018.
- 570 72. C. Hofmann-Shen, B. O. Vogel, M. Kaffes, A. Rudolph, E. C. Brown, C. Tas, M. Brüne, and A. H. Neuhaus, “Mapping  
571 adaptation, deviance detection, and prediction error in auditory processing,” *NeuroImage*, vol. 207, p. 116432, 2020.
- 572 73. D. Richter, M. Ekman, and F. P. de Lange, “Suppressed sensory response to predictable object stimuli throughout the ventral  
573 visual stream,” *Journal of Neuroscience*, vol. 38, no. 34, pp. 7452–7461, 2018.
- 574 74. R. Näätänen, S. Pakarinen, T. Rinne, and R. Takegata, “The mismatch negativity (mmn): towards the optimal paradigm,”  
575 *Clinical Neurophysiology*, vol. 115, no. 1, pp. 140–144, 2004.
- 576 75. M. Kleiner, D. Brainard, D. Pelli, A. Ingling, R. Murray, and C. Broussard, “What’s new in psychtoolbox-3,” *Perception*,  
577 vol. 36, no. 14, pp. 1–16, 2007.
- 578 76. C. Studholme, D. Hill, and D. Hawkes, “An overlap invariant entropy measure of 3d medical image alignment,” *Pattern  
579 Recognition*, vol. 32, no. 1, pp. 71 – 86, 1999.
- 580 77. A. M. Dale, B. Fischl, and M. I. Sereno, “Cortical surface-based analysis: I. segmentation and surface reconstruction,”  
581 *NeuroImage*, vol. 9, no. 2, pp. 179 – 194, 1999.
- 582 78. C. Destrieux, B. Fischl, A. Dale, and E. Halgren, “Automatic parcellation of human cortical gyri and sulci using standard  
583 anatomical nomenclature,” *NeuroImage*, vol. 53, no. 1, pp. 1 – 15, 2010.
- 584 79. A. O. Blenkmann, H. N. Phillips, J. P. Princich, J. B. Rowe, T. A. Bekinschtein, C. H. Muravchik, and S. Kochen, “elec-  
585 trodes: A comprehensive open-source toolbox for depth and subdural grid electrode localization,” *Frontiers in Neuroin-  
586 formatics*, vol. 11, p. 14, 2017.
- 587 80. B. Fischl, M. I. Sereno, and A. M. Dale, “Cortical surface-based analysis: Ii: Inflation, flattening, and a surface-based  
588 coordinate system,” *NeuroImage*, vol. 9, no. 2, pp. 195–207, 1999.
- 589 81. R. Oostenveld, P. Fries, E. Maris, and J.-M. Schoffelen, “Fieldtrip: Open source software for advanced analysis of meg,  
590 eeg, and invasive electrophysiological data,” *Computational intelligence and neuroscience*, vol. 2011, p. 156869, 01 2011.
- 591 82. M. Li and P. Vitányi, *An Introduction to Kolmogorov Complexity and Its Applications*, 3rd ed., ser. Texts in Computer  
592 Science. Springer New York, 2008.
- 593 83. M. Li, X. Chen, X. Li, B. Ma, and P. Vitányi, “The similarity metric,” *IEEE Transactions on Information Theory*, vol. 50,  
594 no. 12, pp. 3250–3264, 2004.
- 595 84. J. D. Sitt, J.-R. King, I. El Karoui, B. Rohaut, F. Faugeras, A. Gramfort, L. Cohen, M. Sigman, S. Dehaene, and L. Naccache,  
596 “Large scale screening of neural signatures of consciousness in patients in a vegetative or minimally conscious state,” *Brain*,  
597 vol. 137, no. 8, pp. 2258–2270, 06 2014.
- 598 85. A. Canales-Johnson, A. J. Billig, F. Olivares, A. Gonzalez, M. d. C. Garcia, W. Silva, E. Vaucheret, C. Ciruolo, E. Miku-  
599 lan, A. Ibanez, D. Huepe, V. Noreika, S. Chennu, and T. A. Bekinschtein, “Dissociable Neural Information Dynamics of  
600 Perceptual Integration and Differentiation during Bistable Perception,” *Cerebral Cortex*, vol. 30, no. 8, pp. 4563–4580, 03  
601 2020.
- 602 86. C. W. Lynn and D. S. Bassett, “How humans learn and represent networks,” *Proceedings of the National Academy of  
603 Sciences*, vol. 117, no. 47, pp. 29 407–29 415, 2020.
- 604 87. D. Marcus, J. Harwell, T. Olsen, M. Hodge, M. Glasser, F. Prior, M. Jenkinson, T. Laumann, S. Curtiss, and D. Van Essen,  
605 “Informatics and data mining tools and strategies for the human connectome project,” *Frontiers in Neuroinformatics*, vol. 5,  
606 p. 4, 2011.
- 607 88. M. F. Glasser, M. S. Goyal, T. M. Preuss, M. E. Raichle, and D. C. Van Essen, “Trends and properties of human cerebral  
608 cortex: Correlations with cortical myelin content,” *NeuroImage*, vol. 93, pp. 165 – 175, 2014.
